# Supplementary material for: Peptide sequence-driven direct electron transfer properties and binding behaviors of gold-binding peptide-fused glucose dehydrogenase on electrode
Source: PubMed Central journal article supplement — iScience. 2021 Oct 29;24(11):103373. doi: 10.1016/j.isci.2021.103373 (PMC8593565; doi:10.1016/j.isci.2021.103373), 2021-10-29
Supplement: mmc1.pdf [file mmc1.pdf]

**iScience, Volume 24**

**Supplemental information**

**Peptide sequence-driven direct electron transfer  
properties and binding behaviors of gold-binding  
peptide-fused glucose dehydrogenase on electrode**

**Hyeryeong Lee, Eun Mi Lee, Stacy Simai Reginald, and In Seop Chang**

Supplemental information

: Figure S1-S8 and Table S1 and S2

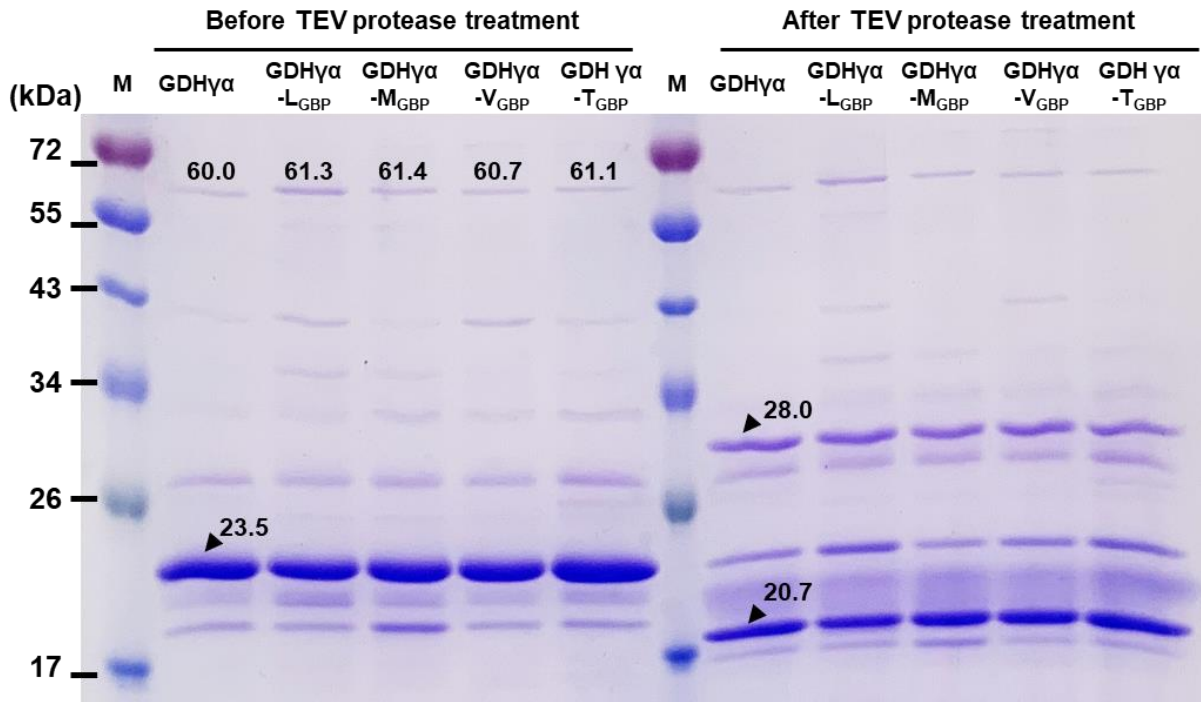

Figure S1. SDS-PAGE analysis of GDH $\alpha$  proteins (native GDH $\alpha$  and GDH $\alpha$ -X<sub>GBP</sub>; X = L, M, T, and V) before and after TEV protease treatments. SDS-PAGE gel (12%); band near 60 kDa: GDH $\alpha$  or GBP-tagged GDH $\alpha$ ; band at 23.5 kDa: GDH $\gamma$  before TEV protease treatment; band at 20.7 kDa: GDH $\gamma$  after TEV protease treatment; band at 28 kDa: TEV protease. M: marker, related to Figure 1.

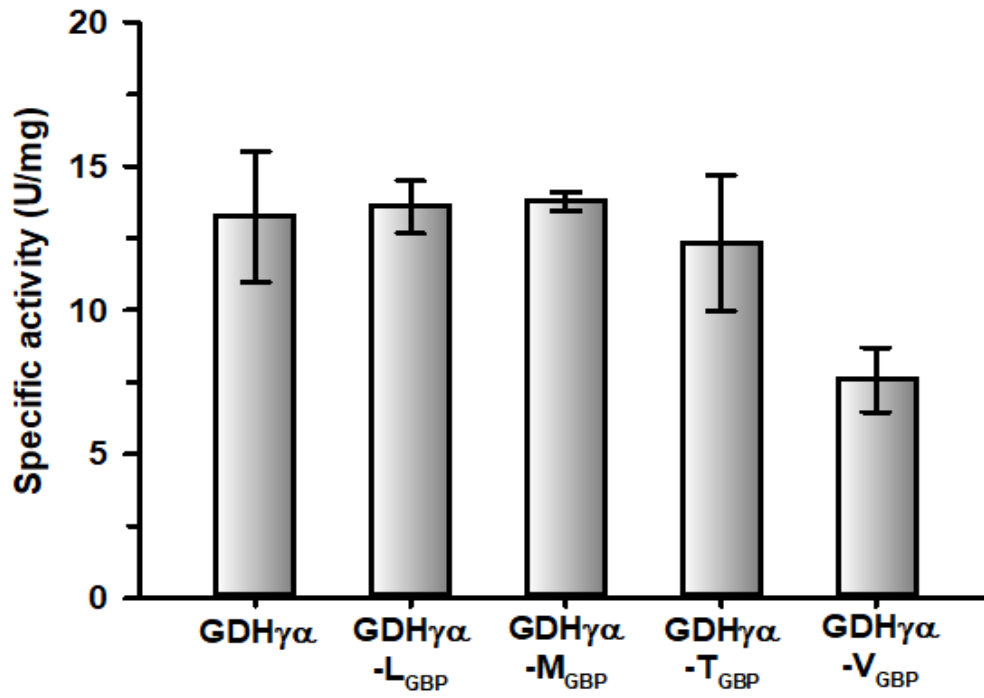

10

11 **Figure S2. Comparison of enzyme activity of native GDH $\gamma\alpha$  and mutants (GDH $\gamma\alpha$ -X<sub>GBP</sub>; X = L, M, T, and**  
12 **V) according to glucose oxidation rate.** Reaction mixture consisted of 0.05 mg/mL protein, 100 mM glucose,

13 0.5 mM DCIP, and 6 mM PMS in 10 mM phosphate buffer (pH 7.4), related to Figure 1.

14

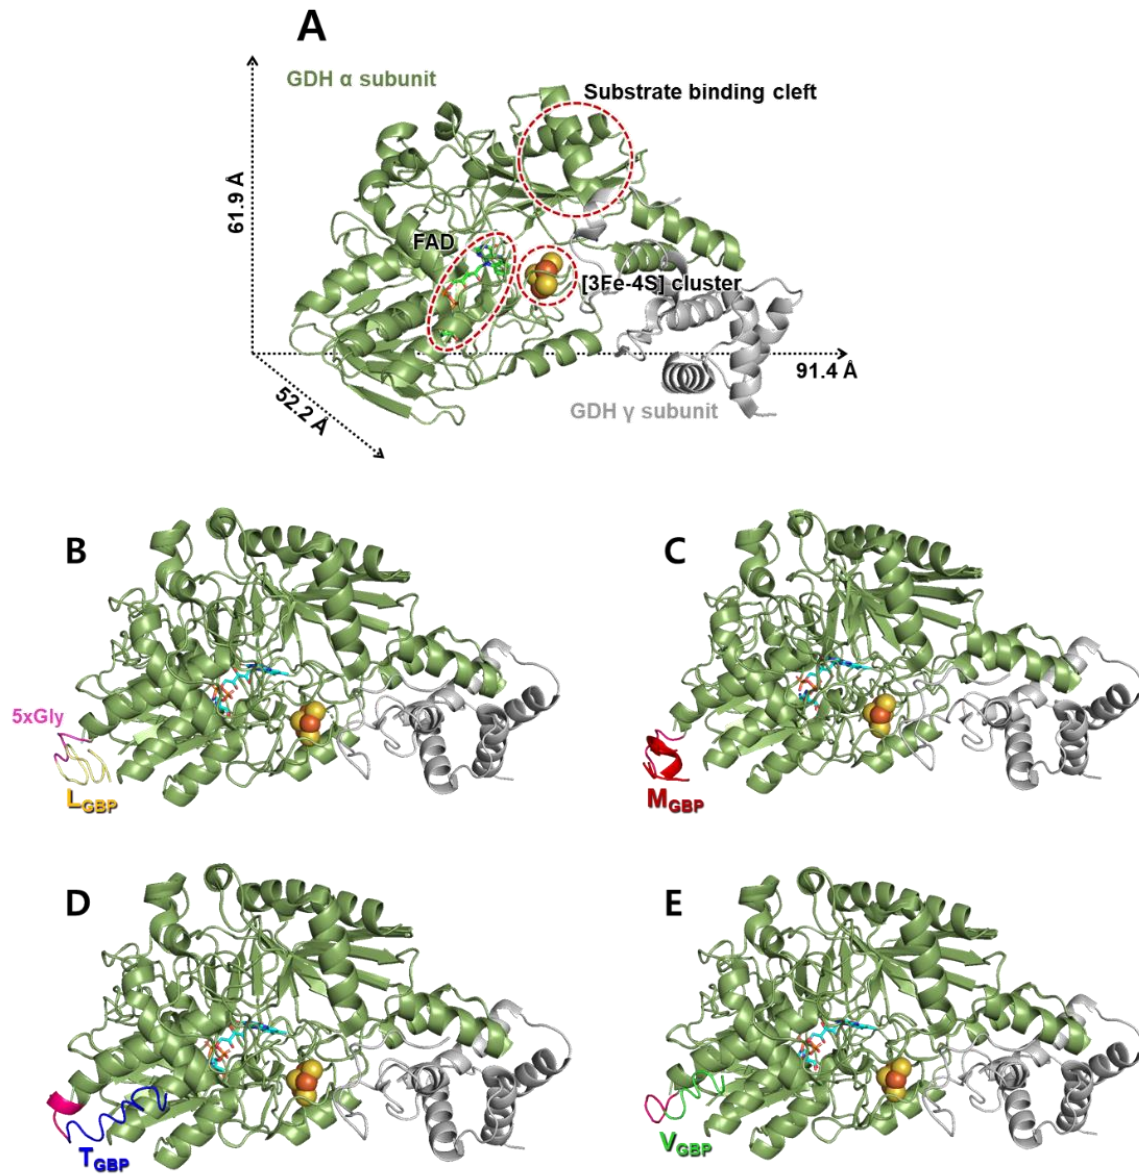

15

16 **Figure S3. Prediction models of native GDH $\alpha$  and fusion GDH $\alpha$  proteins.** (A) Crystal structure of GDH $\alpha$

17 complex reported previously (PDB ID: 6A2U). Herein, the protein structure is visualized with PyMOL program,

18 and the dimensions were analyzed in the same program. Structural models of (B) GDH $\alpha$ -LGBP, (C) GDH $\alpha$ -

19 MGBP, (D) GDH $\alpha$ -TGBP, and (E) GDH $\alpha$ -VGBP. The structures of the GDH  $\alpha$  subunit fused with different GBPs,

20 which presented highest C-value predicted by the I-TASSER, was aligned on PyMOL using previously

21 determined crystal structures for native FAD-dependent glucose dehydrogenase from *Burkholderia cepacia*

22 (PDB ID: 6A2U), related to Figure 2.

23

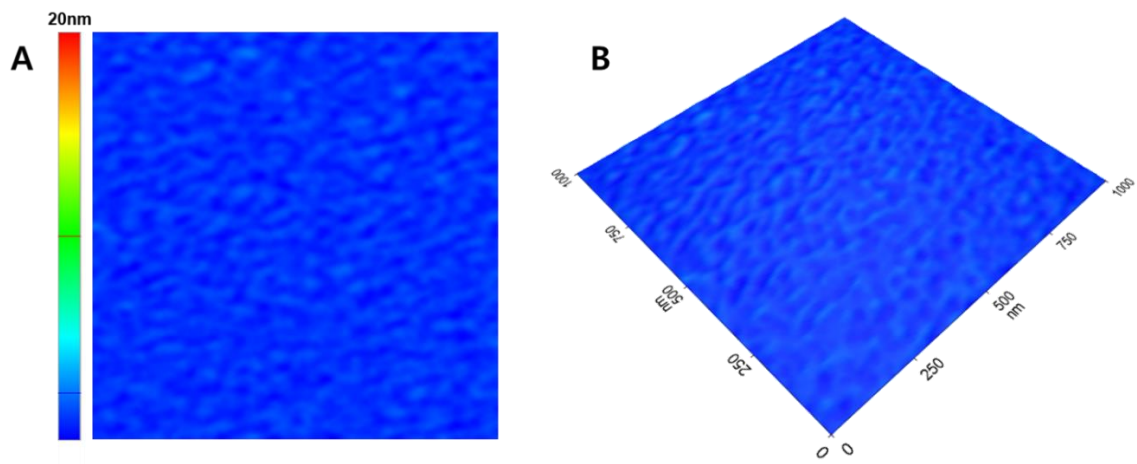

24

25 **Figure S4. AFM images for bare Au surface used for enzyme binding studies. (A) 2-D topography and (B)**

26 **3-D topography; scanned area is  $1\ \mu\text{m} \times 1\ \mu\text{m}$  related to Figure 4.**

27

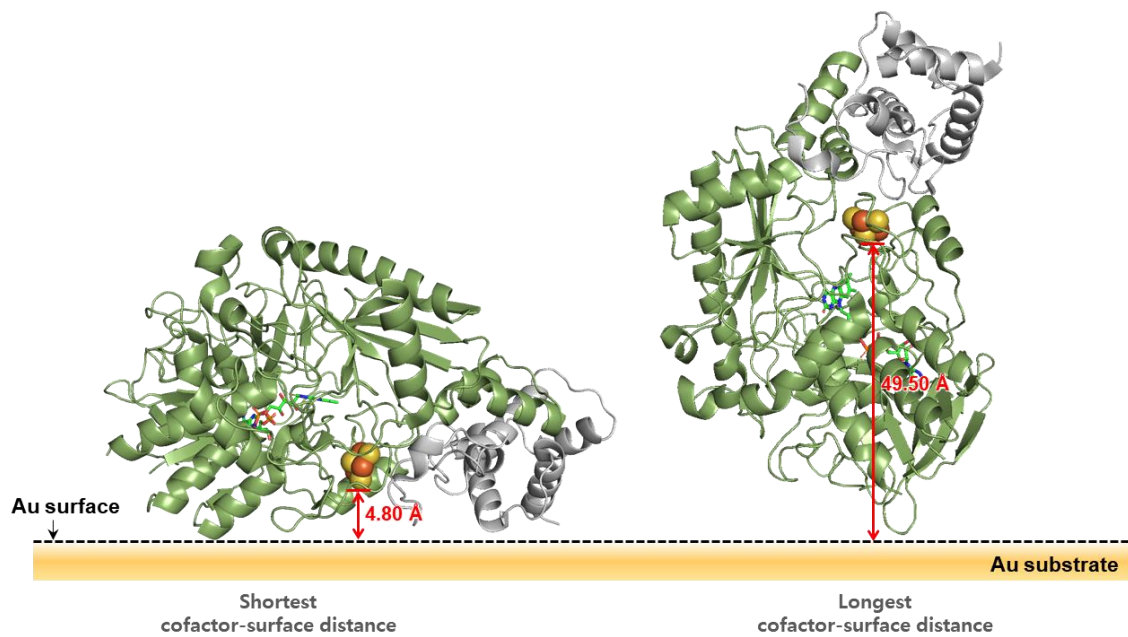

28

29 **Figure S5. Schematic depiction of GDH $\alpha$ -bound gold substrate, and shortest and longest distance**  
30 **between [3Fe-4S] cluster and electrode surface available according to enzyme binding orientation on**  
31 **electrode, related to Figure 5.**

32

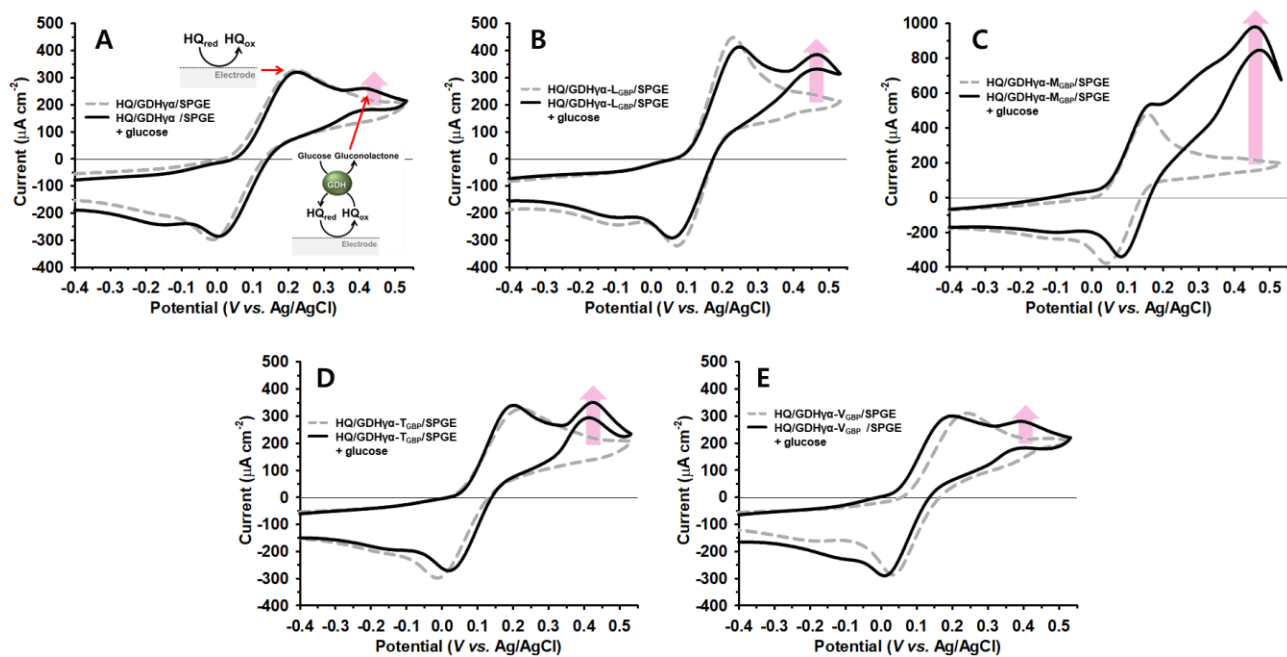

33

34 **Figure S6. CV of mediated electron transfer systems.** The CV profiles of (A) HQ/GDH $\alpha$ /SPGE, (B)

35 HQ/GDH $\alpha$ -L<sub>GBP</sub>/SPGE, (C) HQ/GDH $\alpha$ -M<sub>GBP</sub>/SPGE, (D) HQ/GDH $\alpha$ -T<sub>GBP</sub>/SPGE, and (E) HQ/GDH $\alpha$ -

36 V<sub>GBP</sub>/SPGE in the absence and presence of glucose 100 mM in PBS buffer (pH 7.4) (scan rate: 100 mV s<sup>-1</sup>).

37 The inset within the (A) is schematic description of reaction mechanism corresponding with anodic peaks,

38 related to Figure 6.

39

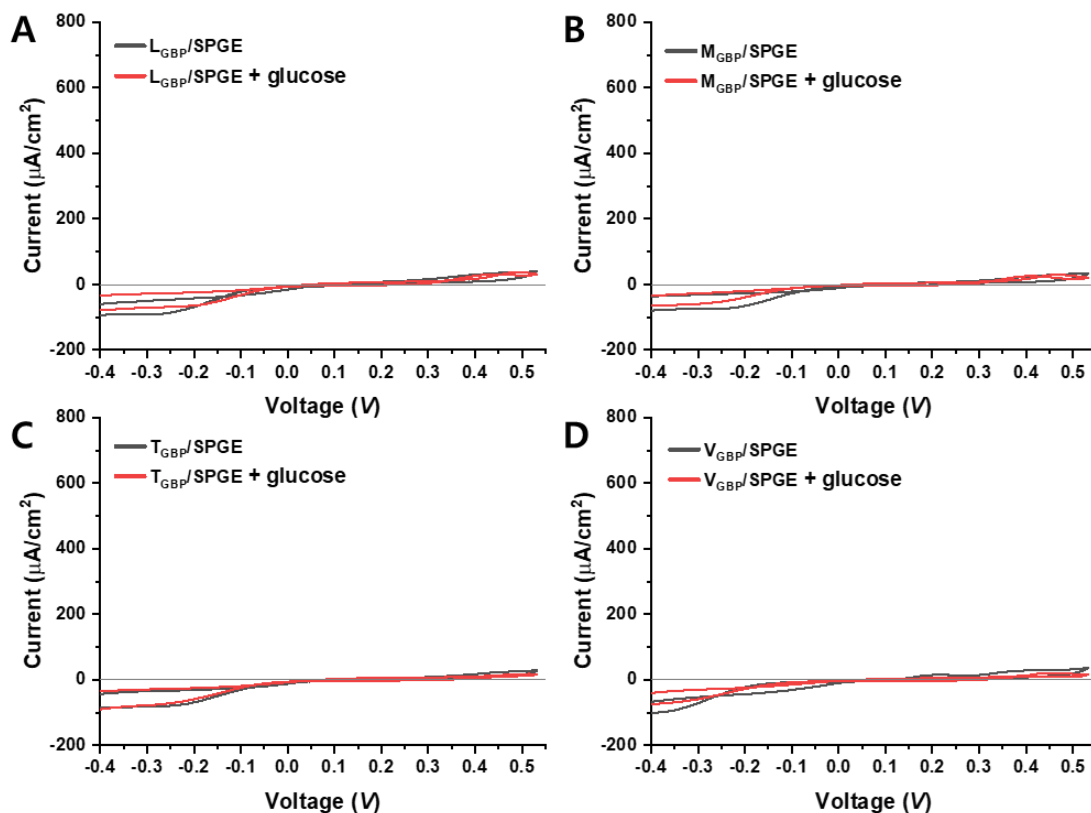

40

41 **Figure S7. CV at the GBP-only conditions.** The CV profiles of (A)  $L_{\text{GBP}}/\text{SPGE}$ , (B)  $M_{\text{GBP}}/\text{SPGE}$ , (C)  $T_{\text{GBP}}/\text{SPGE}$ ,  
 42 (D)  $V_{\text{GBP}}/\text{SPGE}$  in the absence and presence of glucose 100 mM in PBS buffer (pH 7.4) (scan rate:  $100 \text{ mV s}^{-1}$ ). Each peptide was immobilized on electrode surface by immersing the SPGEs in the  $50 \mu\text{M}$  peptide for 2hrs,  
 43 <sup>1</sup>). Each peptide was immobilized on electrode surface by immersing the SPGEs in the  $50 \mu\text{M}$  peptide for 2hrs,  
 44 with mild shaking, related to Figure 6.

45



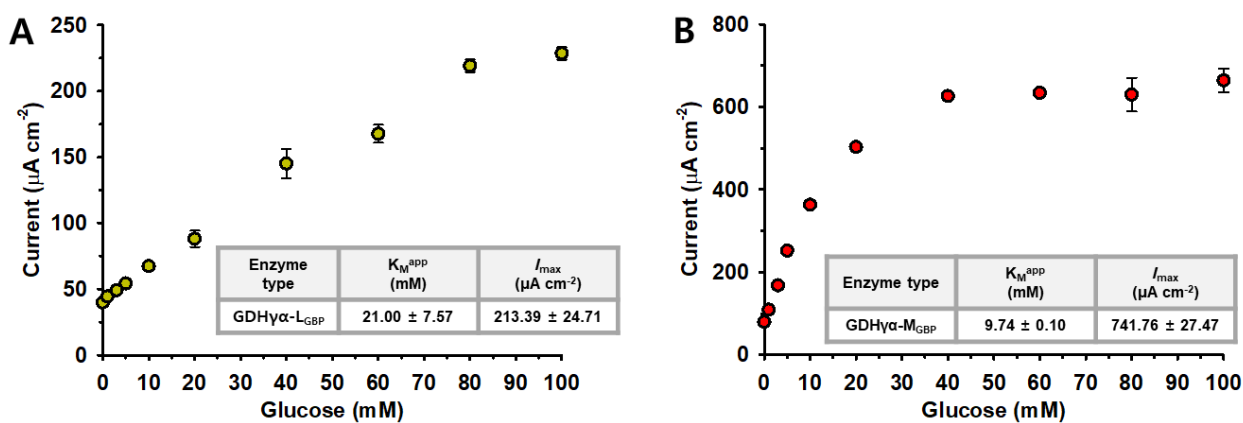

46

47 **Figure S8. Plot of anodic peak current ( $I_{peak}$ ) from cyclic voltammetry.** The  $I_{peak}$  of (A) GDH $\alpha$ -L<sub>GBP</sub>/SPGE  
 48 and (B) GDH $\alpha$ -M<sub>GBP</sub>/SPGE was obtained during successive glucose injections (1, 3, 5, 7, 10, 20, 40, 60, 80,  
 49 and 100 mM). Inset: apparent electrochemical parameters ( $K_M^{app}$  and  $I_{max}$ ) of GDH $\alpha$ -L<sub>GBP</sub>/SPGE or GDH $\alpha$ -  
 50 M<sub>GBP</sub>/SPGE, related to Figure 6.

51

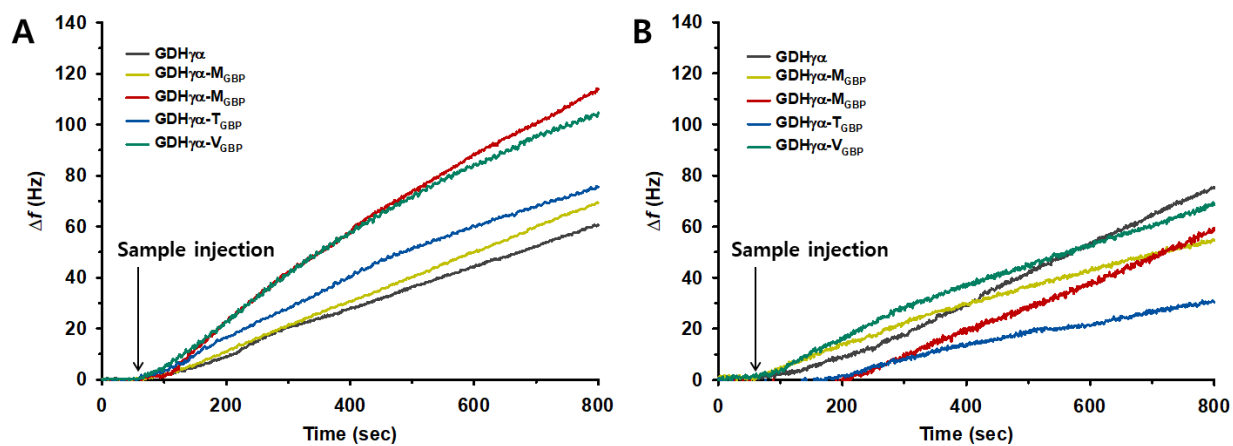

52

53 **Figure S9. QCM frequency changes after injection of wild type GDH $\gamma\alpha$  and GDH $\gamma\alpha$ -X<sub>GBP</sub> (X = L, M, T, and**

54 **V) on (A) Au and (B) Si surfaces, related to Figure 9 and Figure 10.**

55

56 **Table S1. Gold-binding peptides and peptide properties**, related to Figure 1.

| <b>GBP types</b>       | <b>Sequence</b> | <b>Molecular weight (Da)</b> | <b>Isoelectric point</b> | <b>References</b>          |
|------------------------|-----------------|------------------------------|--------------------------|----------------------------|
| <b>L<sub>GBP</sub></b> | LKAHLPPSRLPS    | 1,315.58                     | 11.41                    | Nam <i>et al.</i> , 2006   |
| <b>M<sub>GBP</sub></b> | MHGKTQATSGTIQS  | 1,446.60                     | 9.88                     | Brown, 1997                |
| <b>T<sub>GBP</sub></b> | TGTSVLIATPGV    | 1,115.29                     | 6.02                     | Huang <i>et al.</i> , 2005 |
| <b>V<sub>GBP</sub></b> | VSGSSPDS        | 734.72                       | 3.75                     | Kim <i>et al.</i> , 2010   |

57

58

59 **Table S2. Onset and peak potentials in cyclic voltammogram of native GDH $\alpha$ /SPGE or GDH $\alpha$ -**  
 60 **X<sub>GBP</sub>/SPGE (X = L, M, T, or V), related to Figure 6.**

| <b>Types of enzyme-electrodes</b>                  | <b><math>E_{on}^a</math> (V vs. Ag/AgCl)</b> | <b><math>E_p^b</math> (V vs. Ag/AgCl)</b> |
|----------------------------------------------------|----------------------------------------------|-------------------------------------------|
| <b>GDH<math>\alpha</math>/SPGE</b>                 | 0.364 $\pm$ 0.006                            | 0.420 $\pm$ 0.006                         |
| <b>GDH<math>\alpha</math>-L<sub>GBP</sub>/SPGE</b> | 0.036 $\pm$ 0.009                            | 0.359 $\pm$ 0.011                         |
| <b>GDH<math>\alpha</math>-M<sub>GBP</sub>/SPGE</b> | -0.304 $\pm$ 0.003                           | -0.091 $\pm$ 0.005                        |
| <b>GDH<math>\alpha</math>-T<sub>GBP</sub>/SPGE</b> | N.M. <sup>c</sup>                            | N.M.                                      |
| <b>GDH<math>\alpha</math>-V<sub>GBP</sub>/SPGE</b> | 0.191 $\pm$ 0.004                            | 0.310 $\pm$ 0.004                         |

61 <sup>a</sup>onset potential; <sup>b</sup>peak potential; <sup>c</sup>not measurable
